# Supplementary material for: The effect of antecedent hypoglycaemia on β2-adrenergic sensitivity in healthy participants with the Arg16Gly polymorphism of the β2-adrenergic receptor
Source: PubMed Central journal article supplement — Diabetologia. 2011 Feb 6;54(5):1212–8. doi: 10.1007/s00125-011-2062-3 (PMC3071931; doi:10.1007/s00125-011-2062-3), 2011-02-06
Supplement: 125_2011_2062_MOESM1_ESM.pdf [file 125_2011_2062_MOESM1_ESM.pdf]

## Electronic supplementary material

### Genotyping of the A/G (rs1042713) polymorphism in *ADRB2*

The following primers were used:

forward primer 5'-AGTGCGCTTACCTGCCAGAC -3' (10 pmol), reverse primer 5'-AGCGCTGCTCCGGTTCATAGATTGCCAGGACGATGAGAGACAT-3' (1 pmol), biotin-labelled universal primer (5'Biotin-GCTGCTCCGGTTCATAGATT-3', 9 pmol).

In addition to the primers the PCR mix contained:

50 ng DNA, 0.30 mmol/l deoxynucleotide triphosphate,  
2 U Taq DNA polymerase (Invitrogen, Breda, the Netherlands)  
PCR buffer containing 10 mmol/l Tris-HCl pH 8.0, 50 mmol/l KCl, 0.001% Triton X-100,  
0.01% gelatin and 0.05 mmol/l MgCl<sub>2</sub> in a final volume of 50 µl.

Amplification was performed under the following conditions:

5 min at 94°C, followed by 39 cycles 1 min 94°C, 1 min 61.5°C and 1 min at 72°C, followed by a final extension of 3 min 72°C.

Pyrosequencing of *ADRB2* was performed in a forward assay with the primer 5'-TGCTGGCACCCAAT-3'.
